# Supplementary material
Source: publisher site journal article supplement (https://www.spandidos-publications.com/3855/downloadSupplementary)
Supplement: Supplementary file 1 [file downloadSupplementary]

Figure S1. Gas chromatography-mass spectrometry traces of lime cold-pressed oil.

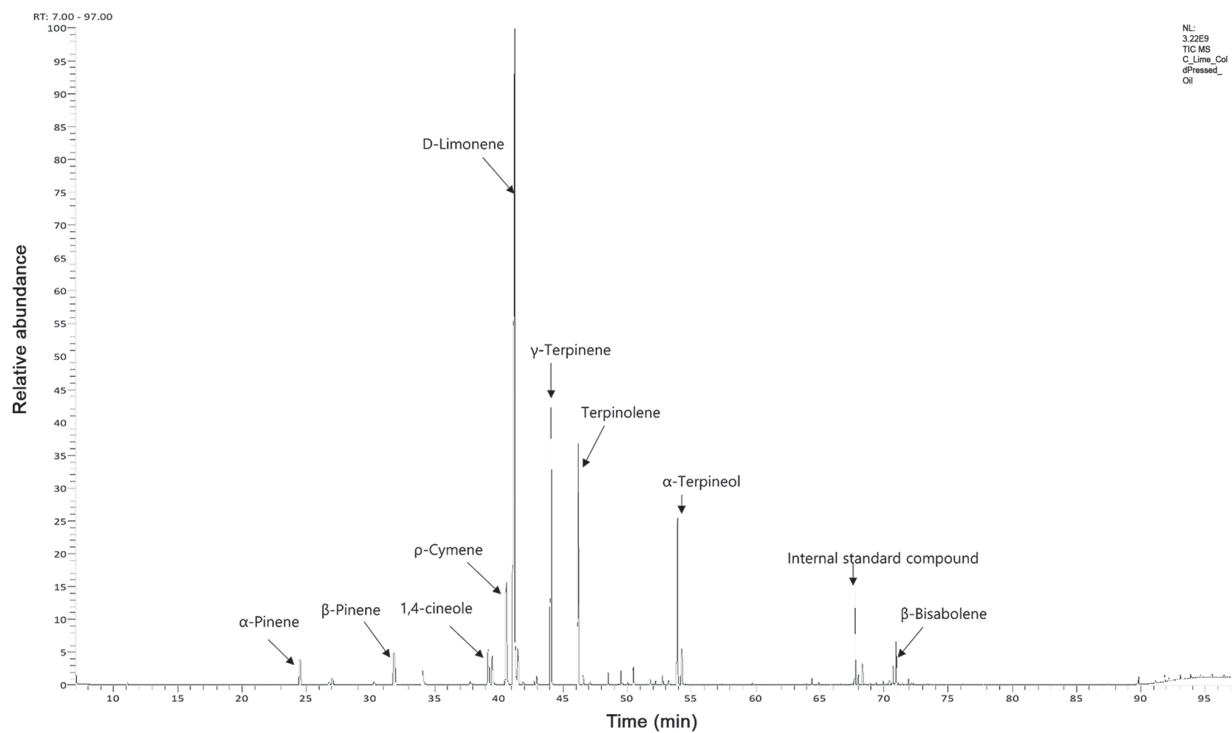

NL  
3.22E9  
TIC: MS  
C:\Lime\_Col  
dpressed\_  
Oil
